# Supplementary material for: Retrieving Ground-Level PM 2.5 Concentrations in China (2013–2021) with a Numerical Model-Informed Testbed to Mitigate Sample Imbalance-Induced Biases
Source: Copernicus journal article supplement (doi:10.5194/essd-2024-170), 2024-05-15
Supplement: Supplementary file 1 [file essd-2024-170-supplement.pdf]

Supplementary information for **Retrieving Ground-Level PM<sub>2.5</sub> Concentrations in China (2013-2021) with a Numerical Model-Informed Testbed to Mitigate Sample Imbalance-Induced Biases**

Siwei Li<sup>1,3,4,\*</sup>, Yu Ding<sup>1</sup>, Jia Xing<sup>2</sup>, Joshua S. Fu<sup>2</sup>

<sup>1</sup> Hubei Key Laboratory of Quantitative Remote Sensing of Land and Atmosphere, School of Remote Sensing and Information Engineering, Wuhan University, Hubei, 430000, China

<sup>2</sup> Department of Civil and Environmental Engineering, the University of Tennessee, Knoxville, TN 37996, USA

<sup>3</sup> State Key Laboratory of Information Engineering in Surveying, Mapping and Remote Sensing, Wuhan University, Wuhan 430079, China

<sup>4</sup> Hubei LuoJia Laboratory, Wuhan University, Wuhan 430079, China

*Correspondence to:* Siwei Li (siwei.li@whu.edu.cn); Jia Xing (jxing3@utk.edu)

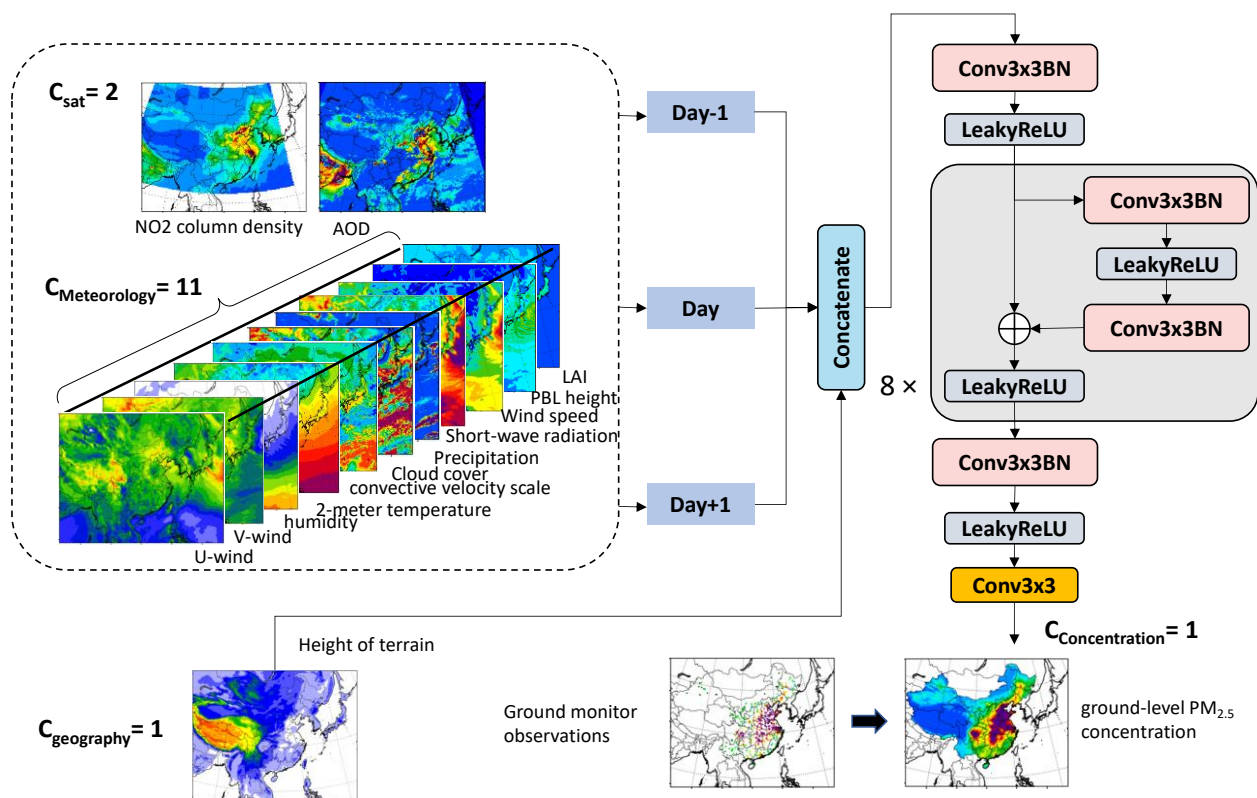

**Figure S1.** ResNet model structure

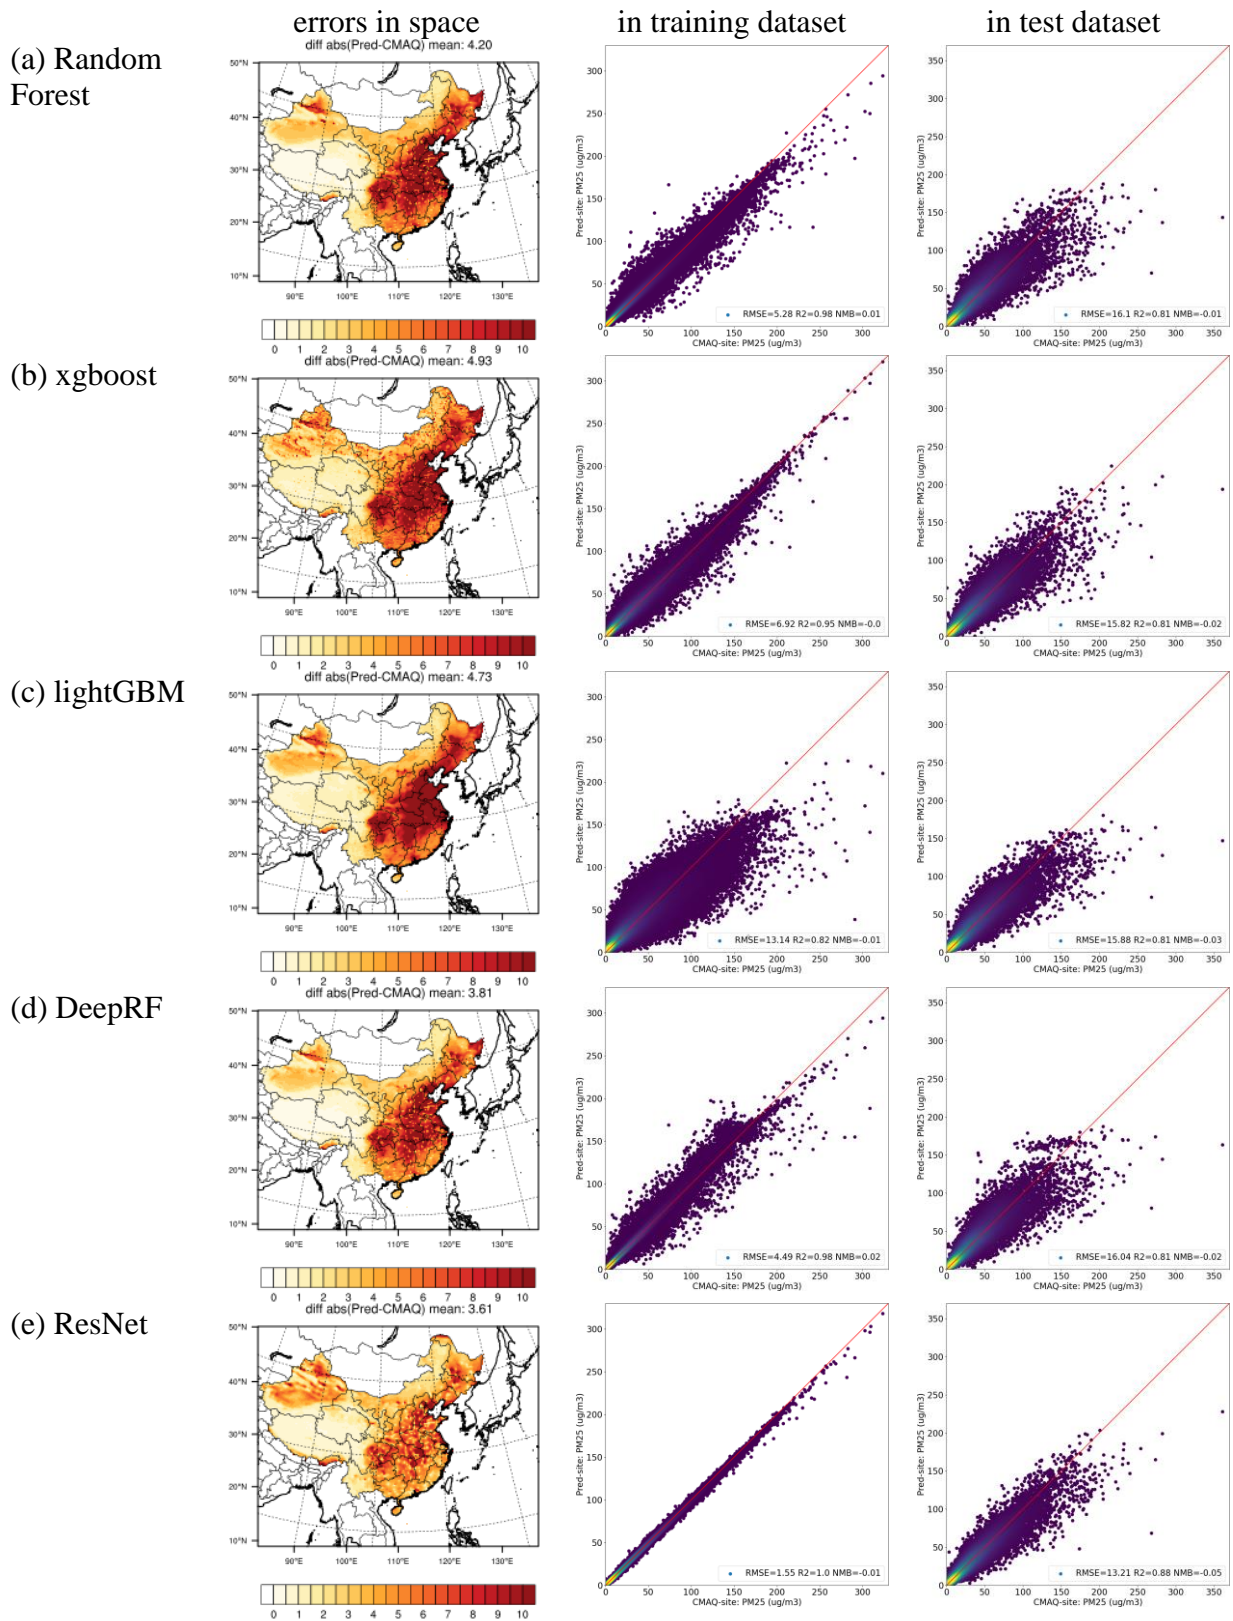

**Figure S2.** Errors in predicting surface PM<sub>2.5</sub> with monitor-located grids training models

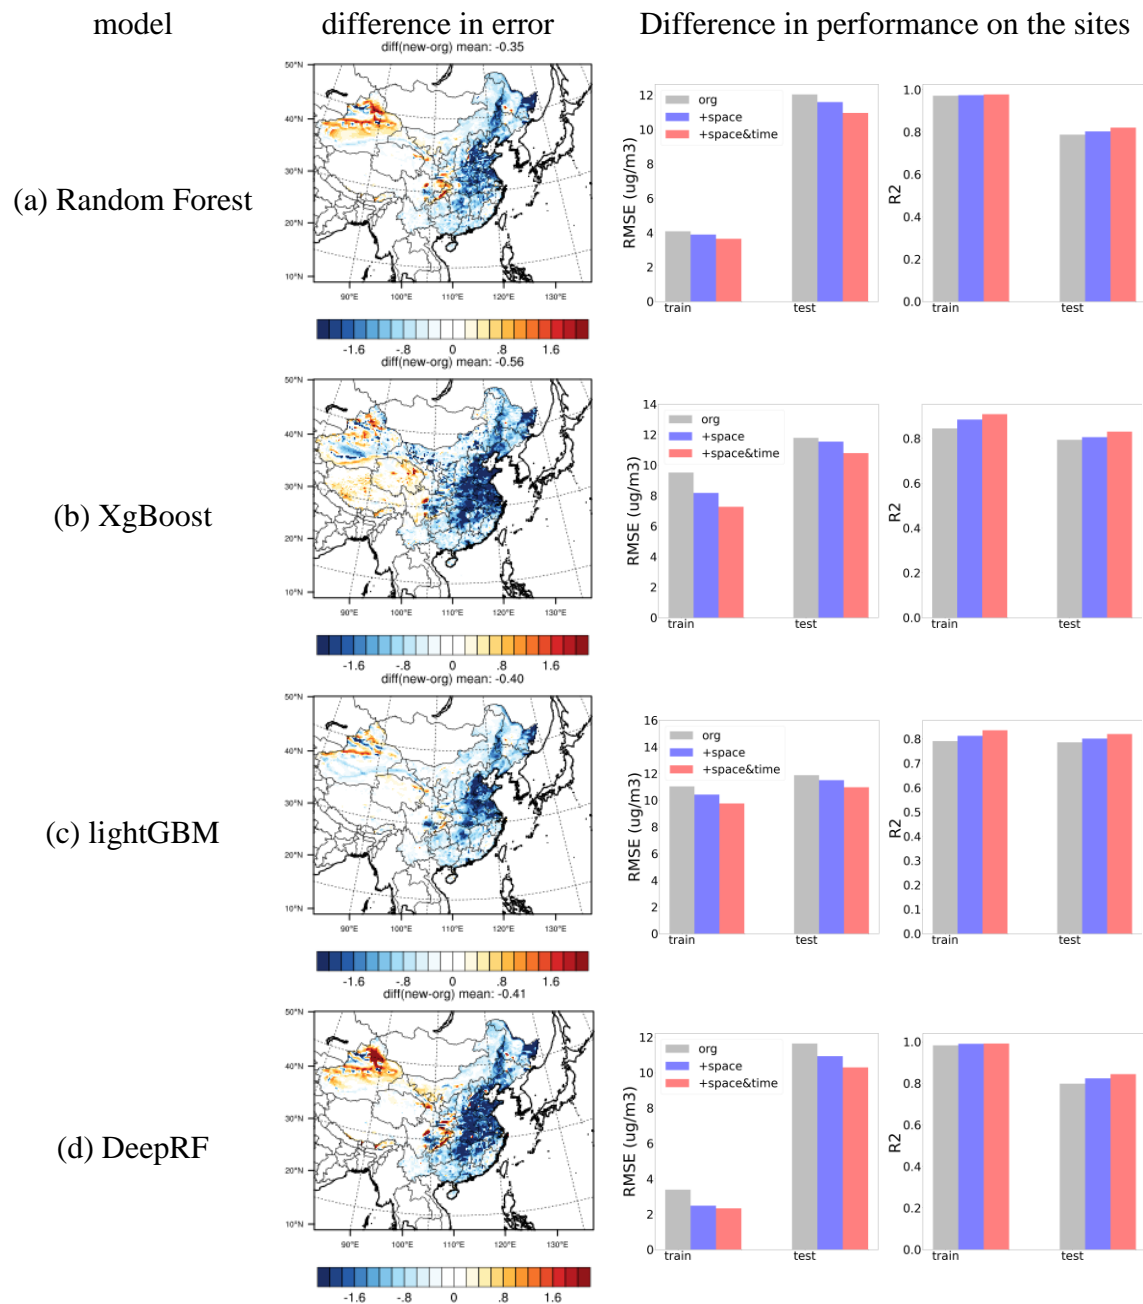

**Figure S3.** Improvement after implementing the features in surrounding grid cells (compared to each baseline model without spatiotemporal-neighbourhood features)

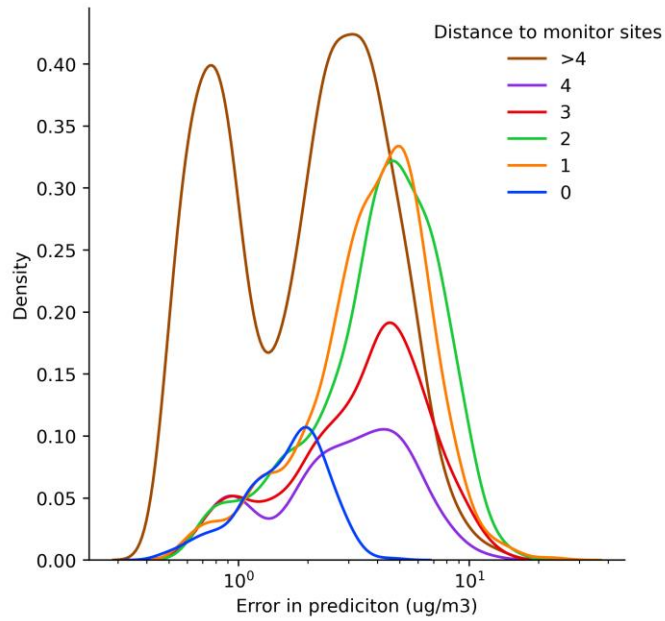

(a) by density

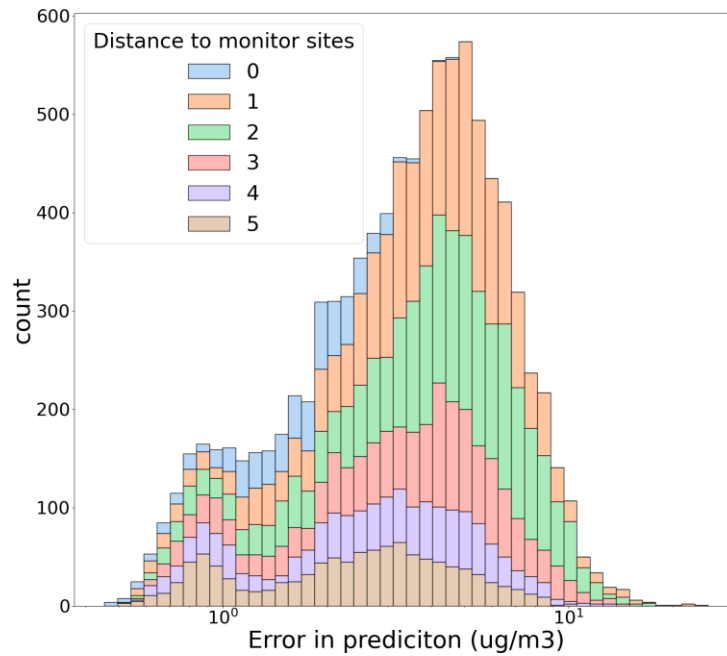

(b) by count

**Figure S4.** Error distribution across the distance to monitor sites (D-site) based on ResNet-time model

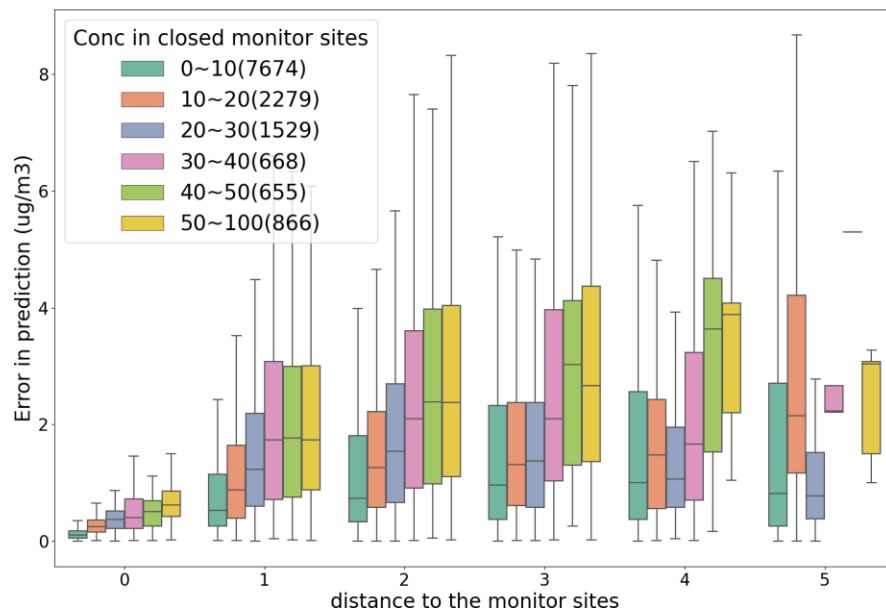

**Figure S5.** Error distribution across the monitor concentrations (B-conc) based on ResNet-time model

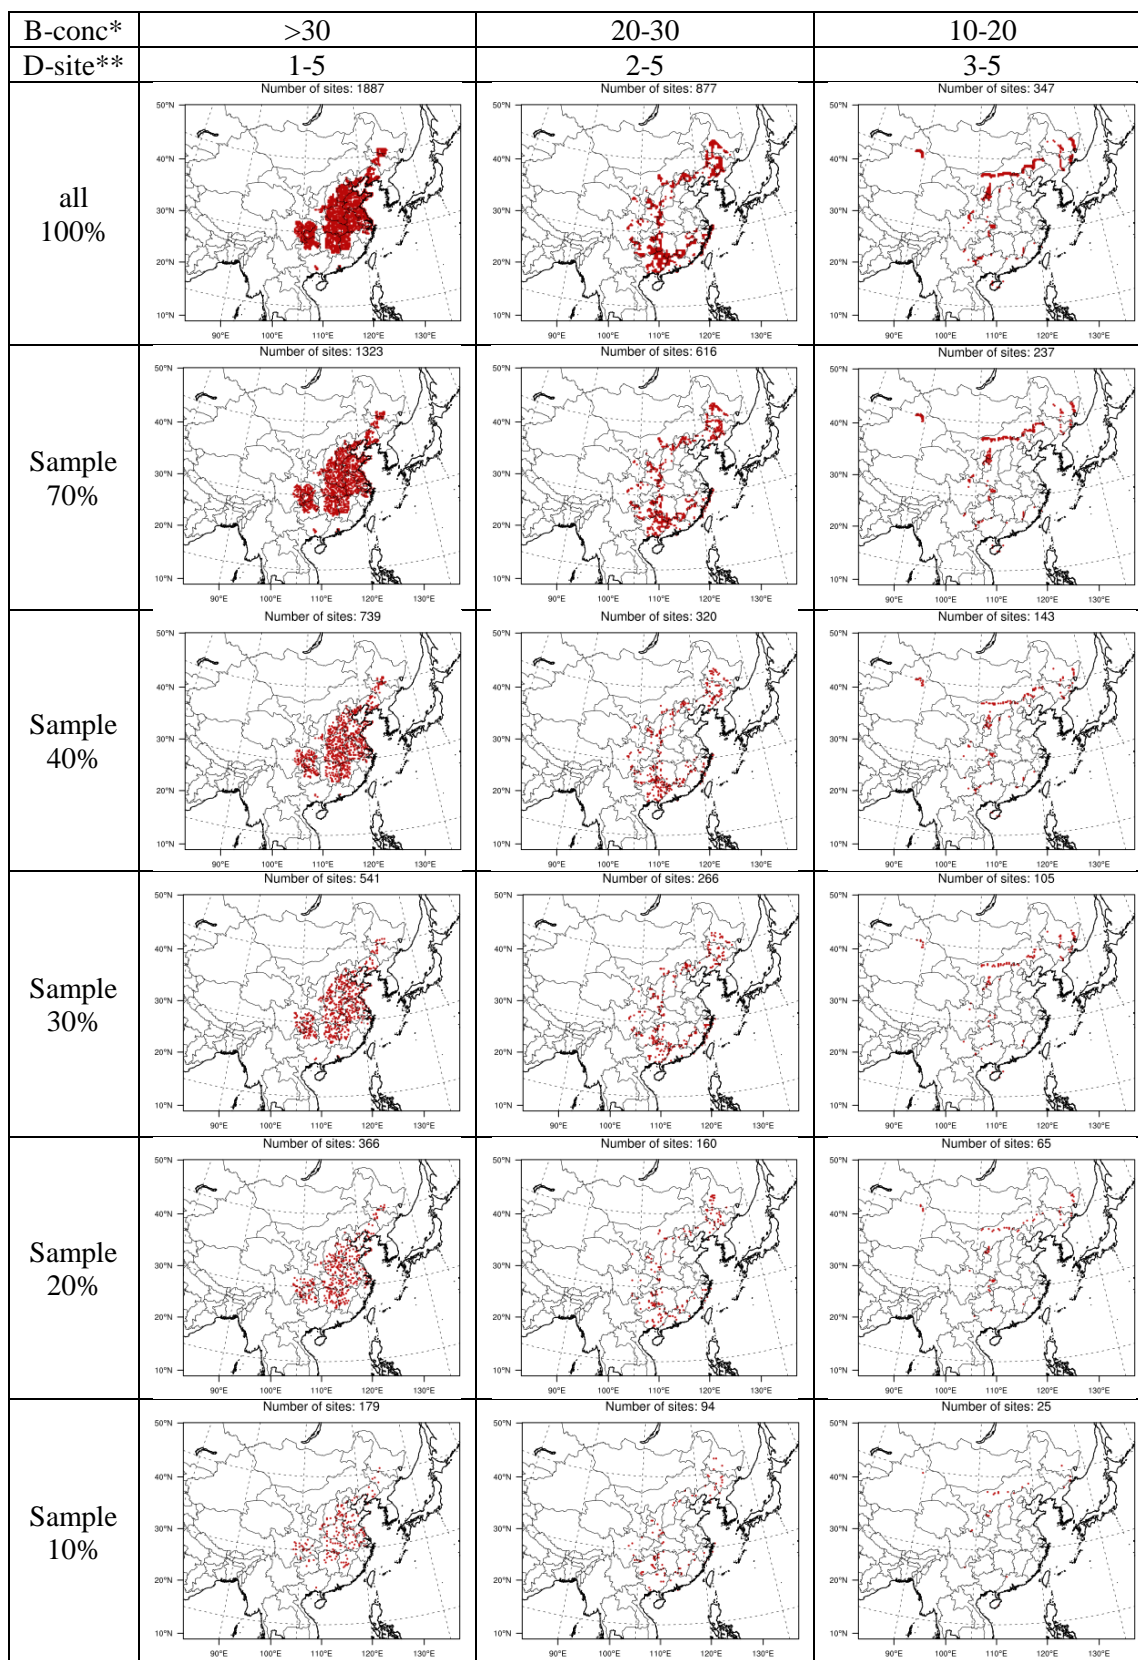

**Figure S6.** Spatial distribution of selected adding sites with certain levels of sampling (B-conc: conc in closed monitor sites; D-site: distance from monitor sites)

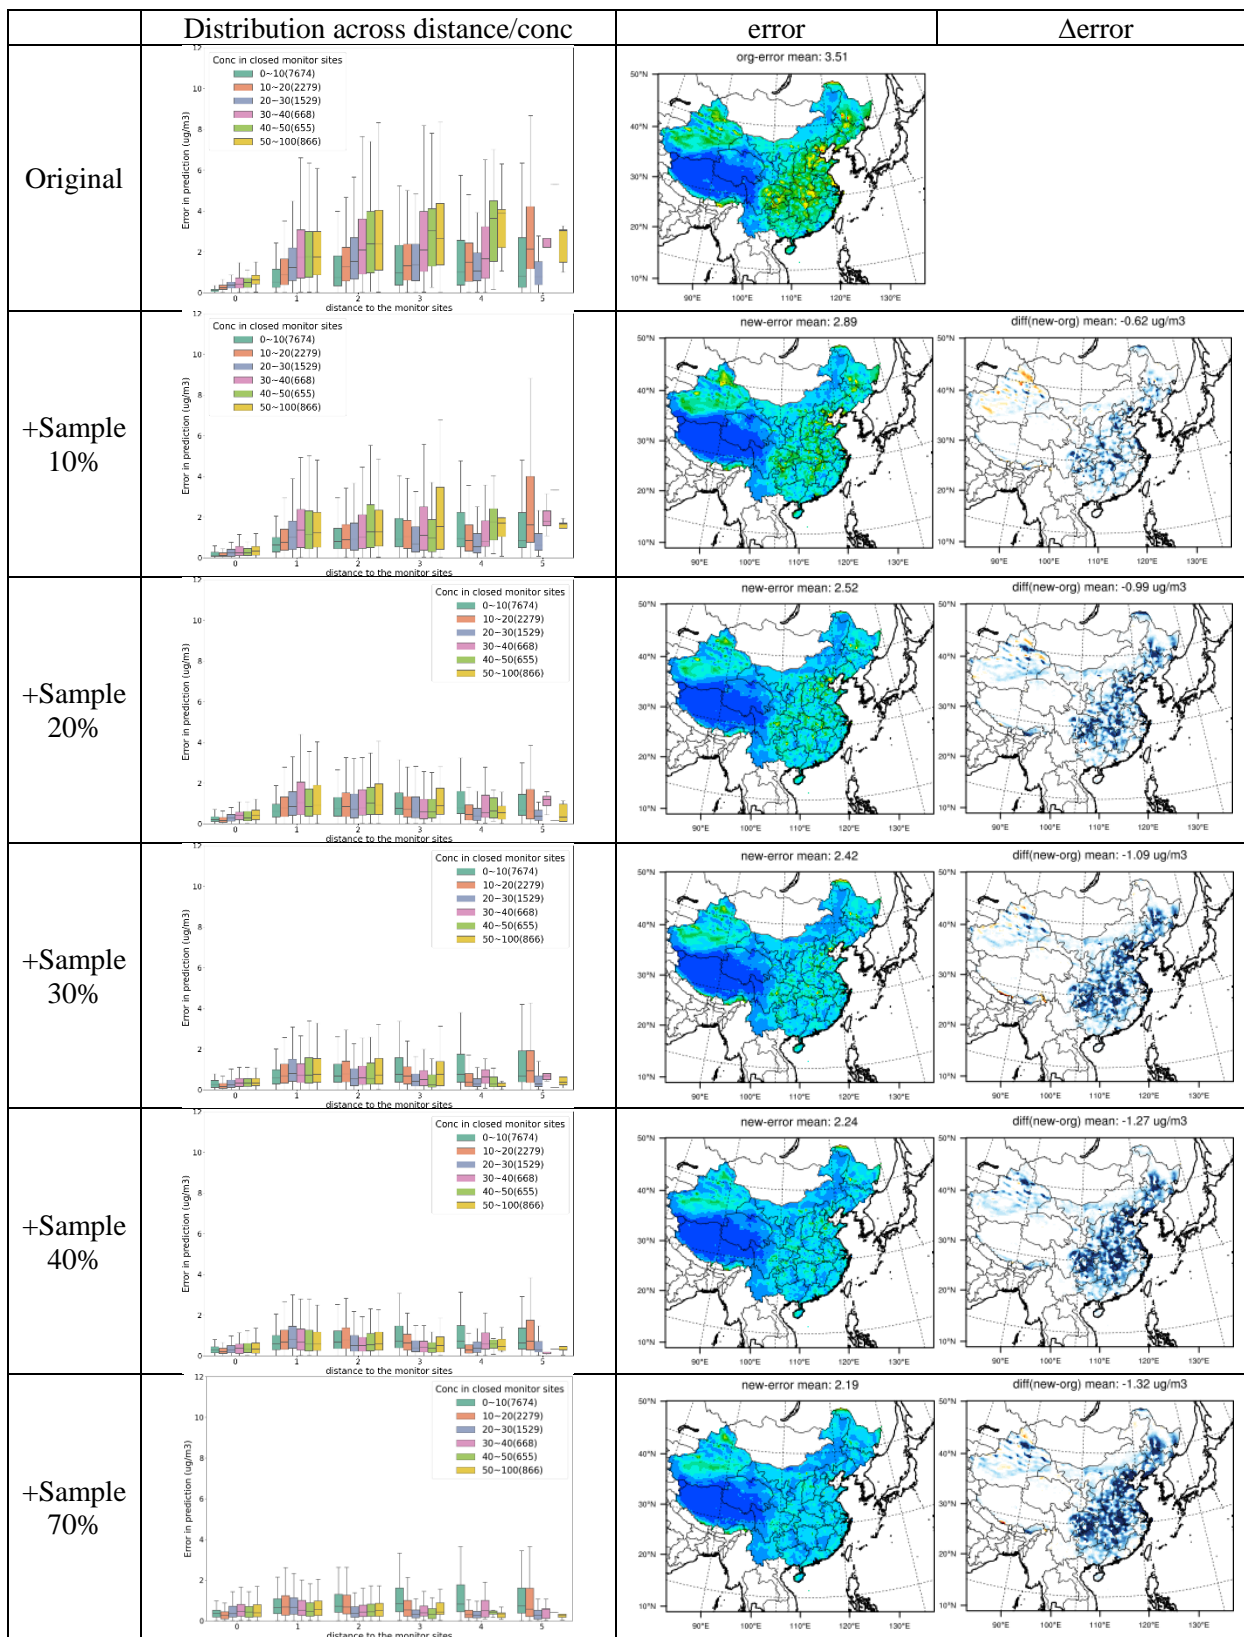



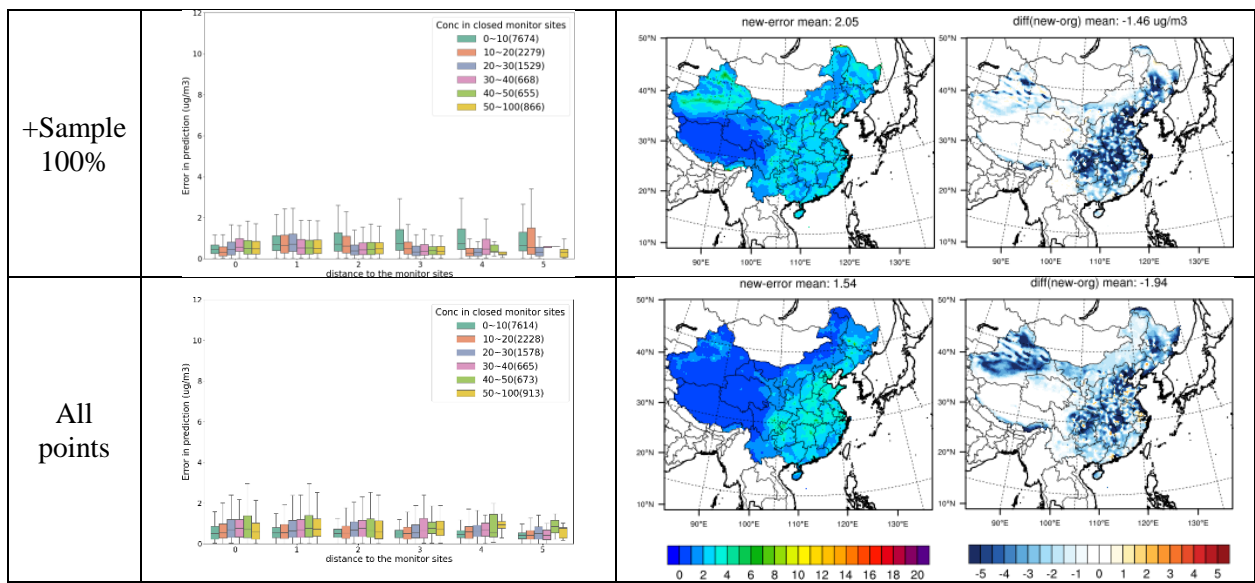

**Figure S7.** Improvement with selected adding sites with certain levels of sampling

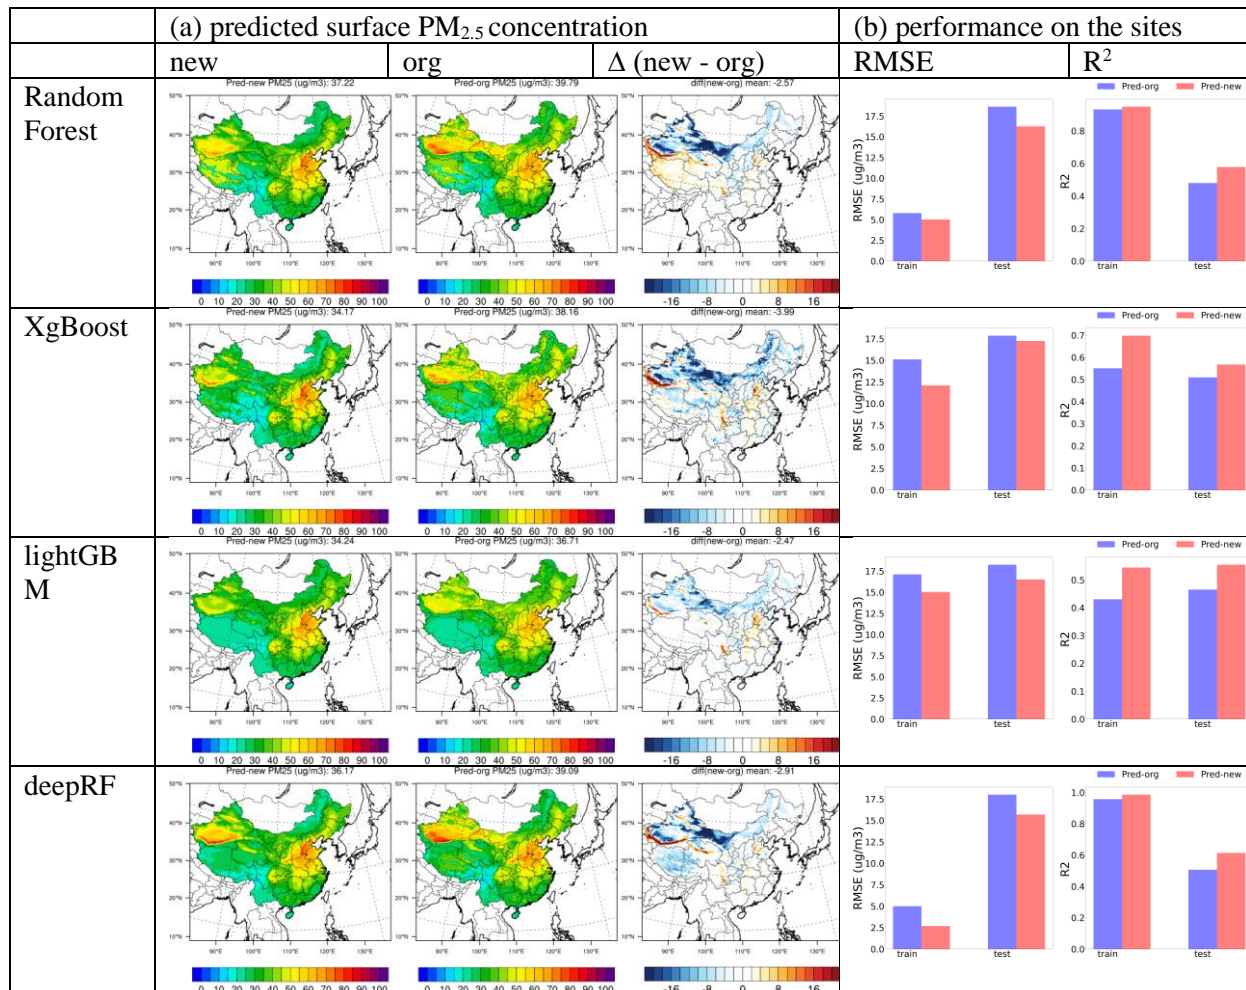

**Figure S8.** Improved performance with inclusion of spatiotemporal-neighbourhood features trained with real measurement dataset

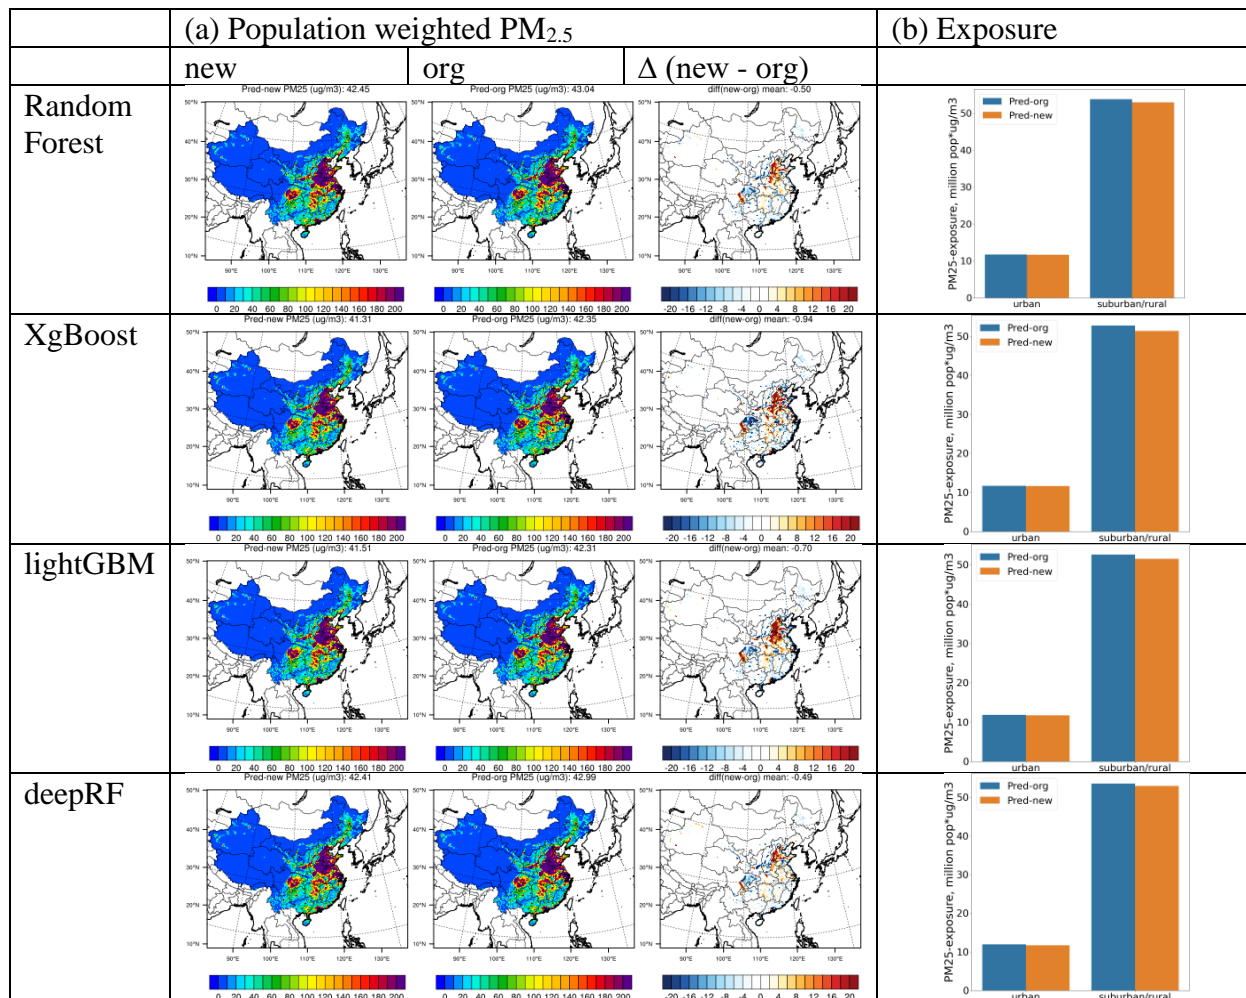

\*Note: within 5 grid cells

**Figure S9.** Uncertainties in estimation of PM<sub>2.5</sub>-related exposure across China

(a) performance in scenarios with adding points

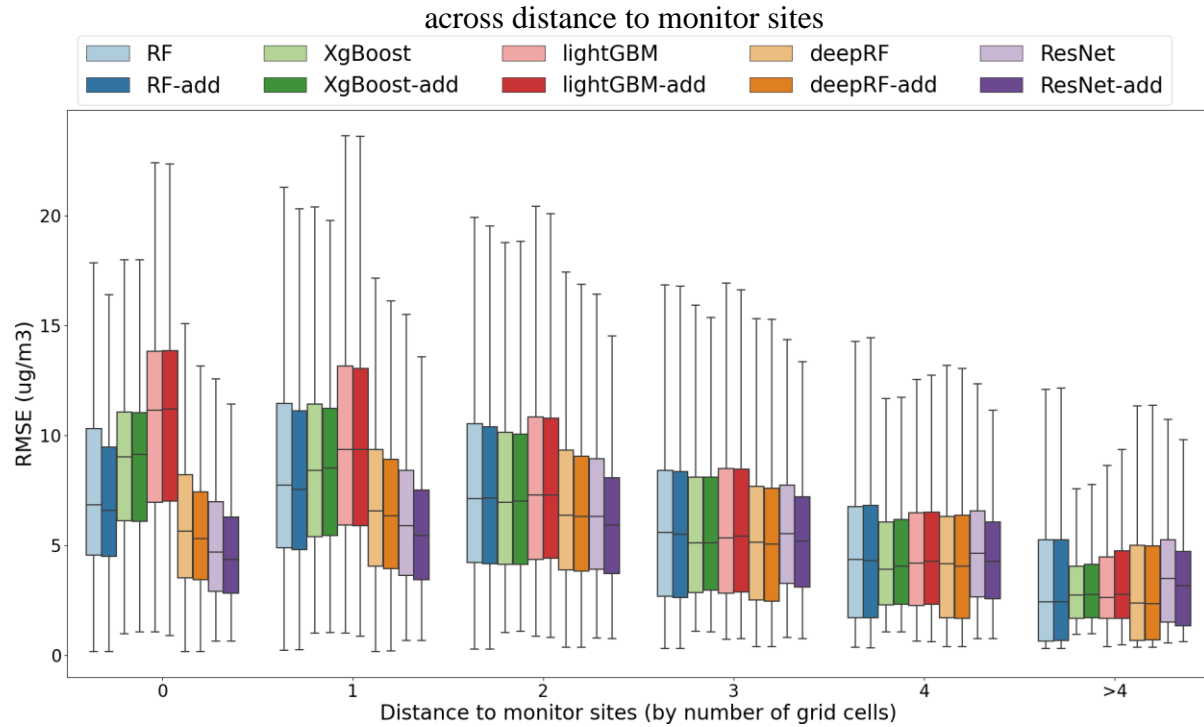

(b) +sample new sites during 2017-2021

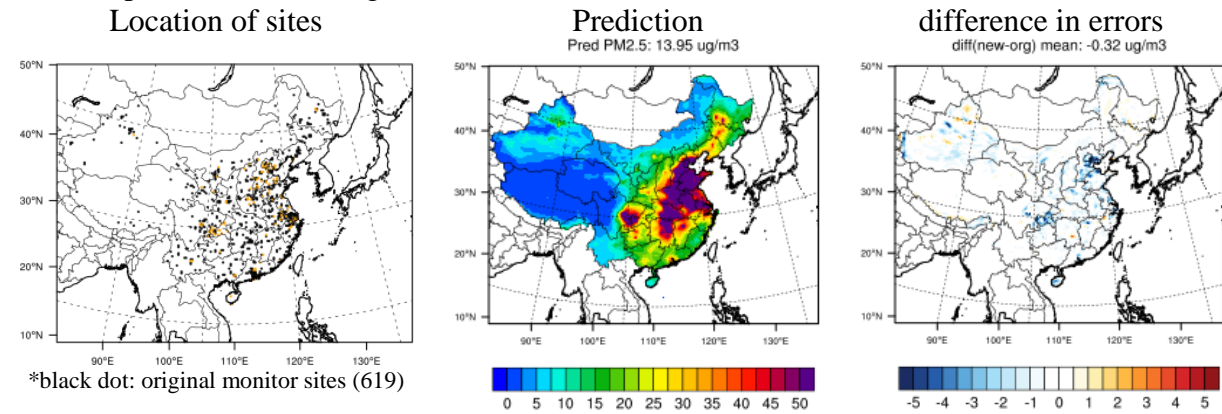

**Figure S10.** Improvement with the inclusion of new sites after 2017 in testing with CMAQ simulations
